# Supplementary material for: Spontaneous resolution of a coordination polymer containing stereogenic five-coordinate Zn(ii) centers and achiral ligands with axially chiral conformation
Source: Royal Society of Chemistry journal article supplement (doi:10.1039/c2ce25428j), 2012-01-01
Supplement: c2ce25428j.pdf [file c2ce25428j.pdf]

# Spontaneous resolution of a coordination polymer containing stereogenic five-coordinate Zn(II) centers and achiral ligands with axially chiral conformation

Sheng-Run Zheng,<sup>\*a</sup> Song-Liang Cai,<sup>a</sup> Jing-Bo Tan,<sup>a</sup> Jun Fan,<sup>a</sup> Wei-Guang Zhang<sup>\*a</sup>

## Supporting information

Table S1 Selected bond lengths [Å] and angles[°] for the compounds.<sup>a</sup>

| Compound <b>1a</b>  |            |                     |            |
|---------------------|------------|---------------------|------------|
| Zn(1)-N(1)#1        | 1.992(4)   | Zn(1)-O(4)#2        | 2.142(3)   |
| Zn(1)-N(2)#2        | 2.023(4)   | Zn(1)-O(1)#1        | 2.311(3)   |
| Zn(1)-N(3)          | 2.024(4)   |                     |            |
| O(1)-Zn(1)#4        | 2.311(3)   | N(1)#1-Zn(1)-O(4)#2 | 101.80(13) |
| N(2)-Zn(1)#3        | 2.023(4)   | N(2)#2-Zn(1)-O(4)#2 | 81.38(13)  |
| N(1)-Zn(1)#4        | 1.992(4)   | N(3)-Zn(1)-O(4)#2   | 93.37(13)  |
| N(1)#1-Zn(1)-N(2)#2 | 120.25(14) | N(1)#1-Zn(1)-O(1)#1 | 77.87(13)  |
| N(1)#1-Zn(1)-N(3)   | 118.78(14) | N(2)#2-Zn(1)-O(1)#1 | 92.40(13)  |
| N(2)#2-Zn(1)-N(3)   | 120.55(15) | N(3)-Zn(1)-O(1)#1   | 93.19(13)  |
| Compound <b>1b</b>  |            |                     |            |
| Zn(1)-N(1)#1        | 1.978(5)   | N(1)-Zn(1)#3        | 1.978(5)   |
| Zn(1)-N(2)#2        | 2.019(4)   | N(2)-Zn(1)#4        | 2.019(4)   |
| Zn(1)-N(3)          | 2.024(4)   | O(1)-Zn(1)#3        | 2.310(3)   |
| Zn(1)-O(4)#2        | 2.143(3)   | O(4)-Zn(1)#4        | 2.143(3)   |
| Zn(1)-O(1)#1        | 2.310(3)   | N(1)#1-Zn(1)-N(2)#2 | 120.37(16) |
| N(1)#1-Zn(1)-N(3)   | 118.25(17) | N(1)#1-Zn(1)-O(1)#1 | 77.78(16)  |
| N(2)#2-Zn(1)-N(3)   | 120.96(18) | N(2)#2-Zn(1)-O(1)#1 | 92.42(15)  |
| N(1)#1-Zn(1)-O(4)#2 | 101.92(15) | N(3)-Zn(1)-O(1)#1   | 93.21(14)  |
| N(2)#2-Zn(1)-O(4)#2 | 81.29(15)  | O(4)#2-Zn(1)-O(1)#1 | 172.56(14) |
| N(3)-Zn(1)-O(4)#2   | 93.44(14)  |                     |            |

<sup>a</sup>Symmetry transformations used to generate equivalent atoms: #1  $x + 1/2, -y + 3/2, -z + 1$ ; #2  $-x + 3/2, -y + 2, z + 1/2$ ; #3  $-x + 3/2, -y + 2, z - 1/2$ ; #4  $x - 1/2, -y + 3/2, -z + 1$  for compound **1**; #1  $x - 1/2, -y + 3/2, -z + 1$ ; #2  $-x + 1/2, -y + 2, z + 1/2$ ; #3  $x + 1/2, -y + 3/2, -z + 1$ ; #4  $-x + 1/2, -y + 2, z - 1/2$  for compound **2**.

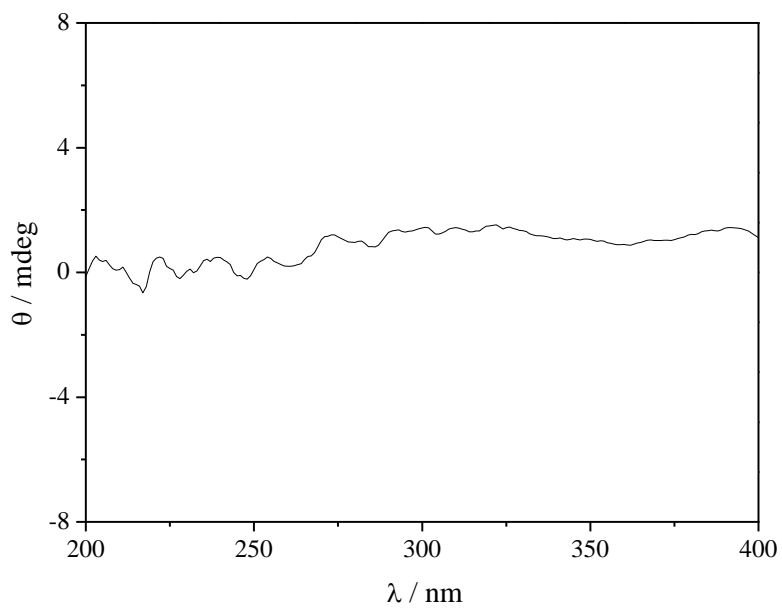

**Fig. S1** CD spectroscopy of bulk crystals
